# Supplementary material for: The Effect of a Unique Region of Parvovirus B19 Capsid Protein VP1 on Endothelial Cells
Source: MDPI journal article supplement (doi:10.3390/biom11040606), 2021-04-19

**Table S1:** List of antibodies used for cells characterization

| Antibody name | Company                   | Dilution |
|---------------|---------------------------|----------|
| CD13          | Santa Cruz (sc-136484)    | 1:500    |
| CD14          | Merck Millipore (2003608) | 1:200    |
| CD44          | Cell Signaling (5640S)    | 1:800    |
| CD45          | Merck Millipore (2003607) | 1:200    |
| CD54          | Merck Millipore (MAB2130) | 1:100    |
| CD90          | Dianova (T3130)           | 1:100    |

**Table S2:** List of antibodies used for immunocytochemistry

| Antibody name         | Company                   | Dilution |
|-----------------------|---------------------------|----------|
| Anti-globoside GL4    | Matreya LLC (1960)        | 1:250    |
| Ku80                  | Cell Signaling (C48E7)    | 1:200    |
| Anti-Integrin alpha 5 | Abcam (ab150361)          | 1:250    |
| Anti-Integrin beta 1  | Abcam (ab179471)          | 1:250    |
| CD31                  | Abcam (ab264089)          | 1:200    |
| CD54                  | Merck Millipore (MAB2130) | 1:250    |
| Alexa Fluor 488       | Invitrogen (A-11094)      | 1:500    |
| Alexa Fluor 488       | Invitrogen (A-11001)      | 1:500    |

**Table S3:** Primer sequences of genes analyzed by real-time PCR

| Gene                 | Primers                                                               |
|----------------------|-----------------------------------------------------------------------|
| <i>c-Fos</i> (Rat)   | FW: 5'-GGGAGCTGACAGATACGCTC-3'<br>RV: 5'-TCAAGTCCAGGGAGGTCACA-3'      |
| <i>c-Jun</i> (Rat)   | FW: 5'-GCCACCGAGACCGTAAAGAA-3'<br>RV: 5'-TAGCACTCGCCCAACTTCAG-3'      |
| <i>GAPDH</i> (Rat)   | FW: 5'-AGTGCCAGCCTCGTCTCATA-3'<br>RV: 5'-ATGAAGGGGTCGTTGATGGC-3'      |
| <i>c-Fos</i> (Human) | FW: 5'-GCCTCTCTTACTACCACTCACC-3'<br>RV: 5'-AGATGGCAGTGACCGTGGGAAT-3'  |
| <i>c-Jun</i> (Human) | FW: 5'-CCTTGAAAGCTCAGAACTCGGAG-3'<br>RV: 5'-TGCTGCGTTAGCATGAGTTGGC-3' |
| <i>GAPDH</i> (Human) | FW: 5'-GTCTCCTCTGACTTCAACAGCG-3'<br>RV: 5'-ACCACCCTGTTGCTGTAGCCAA-3'  |

**Table S4:** List of antibodies used in western blotting

| Antibody name             | Company                             | Dilution |
|---------------------------|-------------------------------------|----------|
| c-Fos                     | Thermo Scientific (MA536080)        | 1:2000   |
| p-c-Fos                   | Thermo Scientific (PA5-105995)      | 1:1000   |
| c-Jun                     | BD Biosciences (610326)             | 1:500    |
| p-c-Jun                   | BD Biosciences (558036)             | 1:500    |
| JNK                       | Cell Signaling (9258s)              | 1:1000   |
| p-JNK                     | Thermo Scientific (700031)          | 1:1000   |
| ERK                       | Cell Signaling (137F5)              | 1:1000   |
| p-ERK                     | Santa Cruz Biotechnology (sc-16982) | 1:500    |
| GAPDH                     | Invitrogen (MA5-15738)              | 1:1000   |
| HRP-Goat- anti Rabbit IgG | Life Technologies (656120)          | 1:10 000 |
| HRP-Goat anti Mouse IgG   | Life Technologies (626520)          | 1:10 000 |

**Figure S1: Chromatograms of GFP-VP1u purification.** A - Chromatogram of GFP-VP1u purification in a Q sepharose column. Black line – optical absorption at 280 nm, red – conductivity. B – Chromatogram of GFP-VP1u purification in a Superdex75 column.

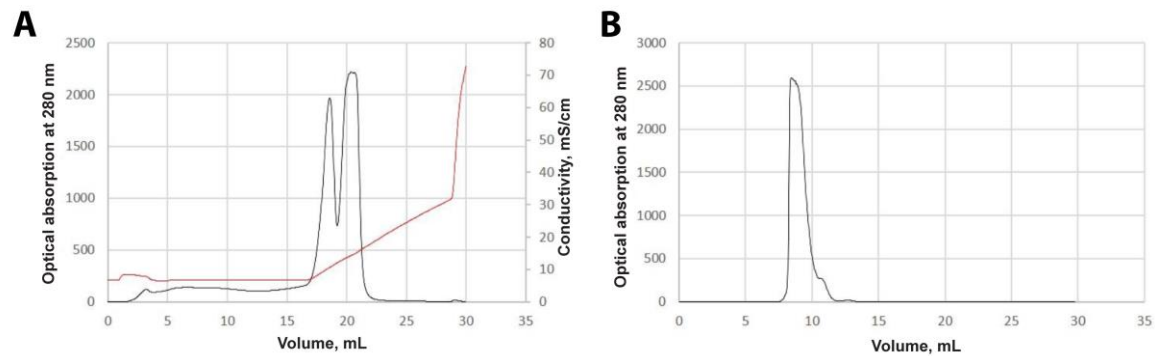

Figure S2: GFP-VP1u presence in cells. GFP was used as the negative control.

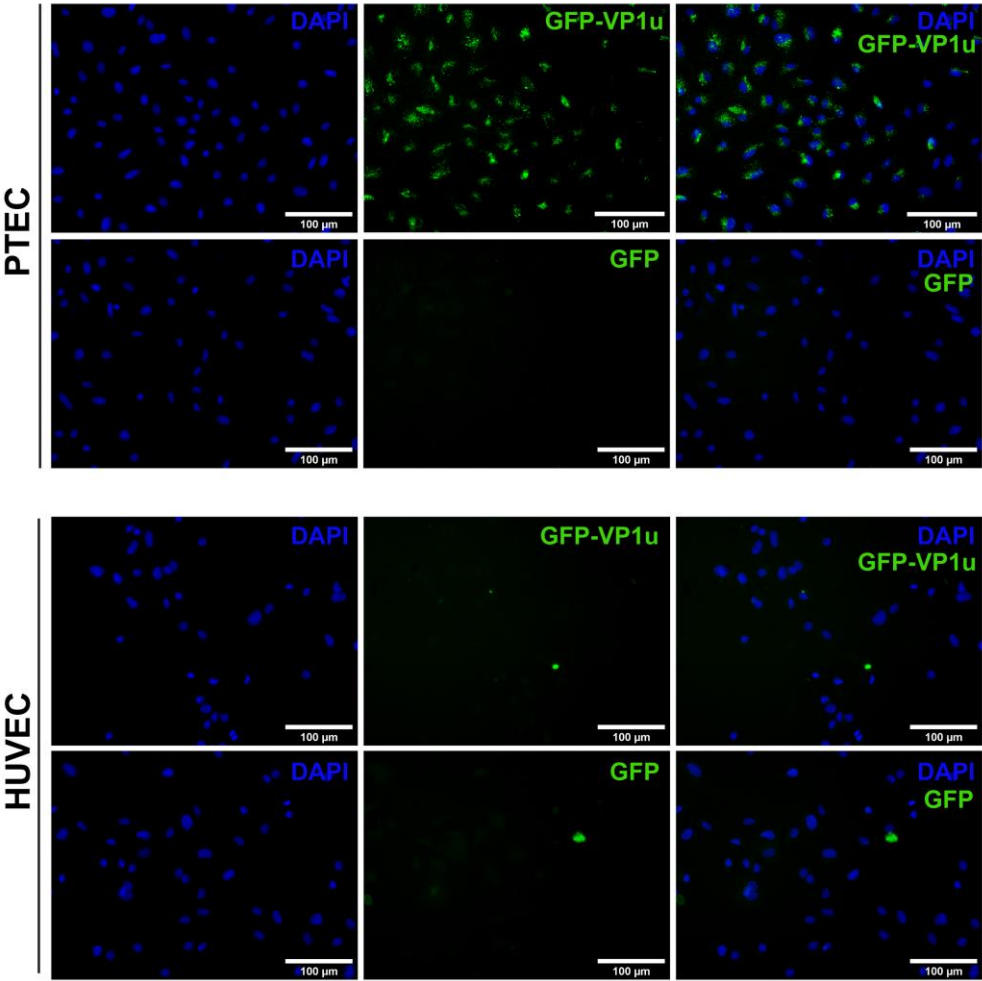

Figure S3: Images of original uncropped Western blots used for the preparation of Figure 4

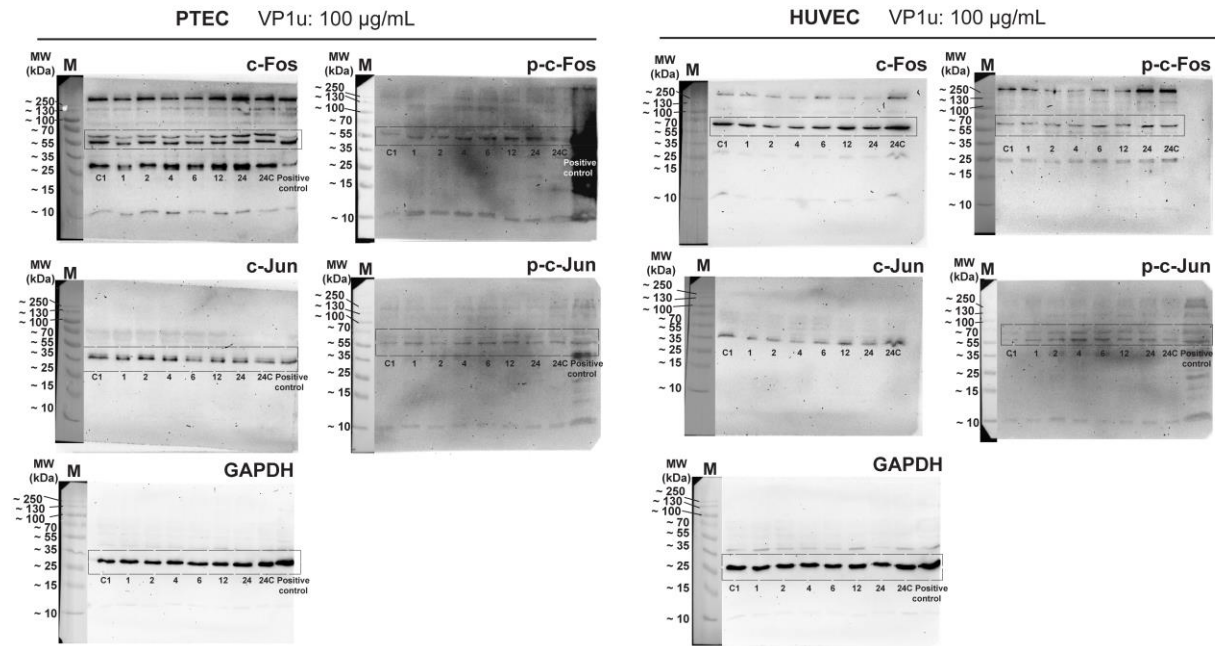

Figure S4: Images of original uncropped Western blots used for the preparation of Figure 5

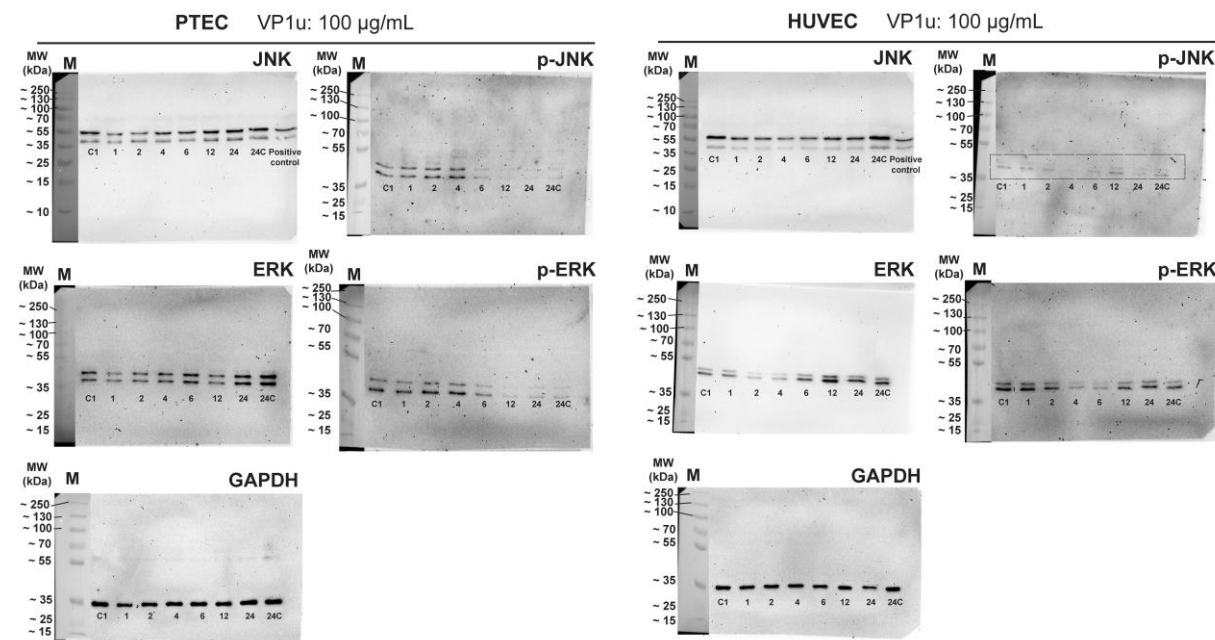

Supplement: s1 [file s1]
